# Supplementary material for: Epidemiology of Cryptococcosis and Cryptococcal Meningitis in a Large Retrospective Cohort of Patients After Solid Organ Transplantation
Source: PubMed Central journal article supplement — Open Forum Infect Dis. 2017 Jan 12;4(1):ofx004. doi: 10.1093/ofid/ofx004 (PMC5414000; doi:10.1093/ofid/ofx004), 2017-01-12
Supplement: ofx004_suppl_supplementary_appendix.pdf [file ofx004_suppl_supplementary_appendix.pdf]

**APPENDIX. Diagnosis Codes Used in Combination to Identify Septicemia, Pneumonia, Surgical Site Infection, and Skin and Soft Tissue Infections**

| <b>Diagnosis</b>               | <b>ICD-9-CM Diagnosis Code</b>                                                                                                                                                                                                                    |
|--------------------------------|---------------------------------------------------------------------------------------------------------------------------------------------------------------------------------------------------------------------------------------------------|
| Septicemia                     | 038.8, 038.9, 790.7                                                                                                                                                                                                                               |
| Pneumonia                      | 483.8, 484.7, 484.8, 485, 486, 510, 510.9, 513.0                                                                                                                                                                                                  |
| Surgical Site Infection        | 998.5, 998.51, 998.59                                                                                                                                                                                                                             |
| Skin and Soft Tissue Infection | 5673.1, 680.0 -680.9, 681.00 – 681.02, 681.10, 681.11, 681.9, 682.0- 682.9, 683, 684, 685.0, 686.0, 686.00, 686.01, 686.09, 686.1, 686.8, 686.9, 675.00- 675.04, 675.10 – 675.14, 675.80 – 675.84, 675.90 – 675.94, 705.83, 727.89, 728.0, 728.86 |
